# Supplementary material
Source: publisher figshare collection journal article supplement (https://tandf.figshare.com/ndownloader/files/16250231)
Supplement: Supplementary file 1 [file 16250231]

**Appendix 1**

Target words and their new related meanings.

| Target | Definition |
| --- | --- |
| Mouse | A prototype of a very small car |
| Farm | A country that exports goods at a low cost |
| Bandage | A revolutionary medical device that is fastened to the body |
| Fee | A side-bet in a poker game |
| Ant | A small remote recording device |
| Path | A series of lines painted on the face in American Indian tribes |
| Grin | A mythical monster with a mischievous fixed smile |
| Hive | Home occupied by three generations of a family |
| Growl | A mobile phone safety alarm |
| Fog | A group of floating particles in the eye that affect vision |
| Widow | An animal forced out of their group |
| Stain | A precious stone that can change colour |
| Cage | An implant fitted around a pacemaker |
| Pearl | A bright ring of light seen in the sky |
| Crew | A group of Celtic males that play musical instruments in unison |
| Pouch | Land surrounding animals’ sleeping area |
| Feast | A conference for the food industry |
| Soup | Water in its hottest state |
| Bone | A residual core of dead stars or planets |
| Carton | Carbon fibre shell for vehicles |
| Snake | An ancient dance move that mimics the way snakes move |
| Carpet | Covering of scales over animals’ feet |
| Spy | A frog that can focus on a single sound |
| Cake | A code word for suspicious food packages brought into prison |
| Join | A junction between agricultural and industrial areas |
| Sip | A small amount of extracted computer data |
| Dawn | A type of nightmare that occurs in the early hours of the morning |
| Foam | Low-radiation nuclear waste |
| Slot | A safe incorporated into furniture |
| Bruise | A blurred spot on a photograph |
| Heap | A unit of measurement for cooking |
| Rust | Camouflage paint for metal objects |

**Appendix 2**

Target-probe word pairs used in Experiment 1.

| Trained word pairs | | | Untrained word pairs | | |
| --- | --- | --- | --- | --- | --- |
| Target | Related probe | Unrelated probe | Target | Related probe | Unrelated probe |
| ant | insect | obesity | barber | brush | wheat |
| ant | wasp | abbey | barber | comb | absence |
| ant | beetle | laundry | barber | razor | sphere |
| bandage | wrap | broom | beef | cattle | truce |
| bandage | patch | photo | beef | lamb | daisy |
| bandage | mummy | pasta | beef | cow | blanket |
| bone | muscle | folder | breeze | draught | agenda |
| bone | calcium | harvest | breeze | blow | jazz |
| bone | vein | bay | breeze | gust | corpse |
| bruise | injury | address | cash | receipt | womb |
| bruise | wound | adviser | cash | cheque | harbour |
| bruise | scratch | vest | cash | savings | moth |
| cage | zoo | album | cave | hollow | cricket |
| cage | canary | rocket | cave | shelter | candy |
| cage | circus | acid | cave | tunnel | badge |
| cake | dough | alien | chin | beard | author |
| cake | cook | grave | chin | lip | locker |
| cake | flour | yard | chin | jaw | flame |
| carpet | vacuum | coal | goose | bird | warrior |
| carpet | stairs | frog | goose | duck | soldier |
| carpet | mat | onion | goose | swan | wreck |
| carton | package | alarm | joke | trick | fur |
| carton | juice | knob | joke | fun | match |
| carton | straw | bat | joke | humour | maths |
| crew | navy | bargain | lion | cub | mint |
| crew | cruise | printer | lion | roar | pear |
| crew | pilot | bean | lion | zebra | sink |
| dawn | horizon | data | ritual | faith | frame |
| dawn | sunrise | bin | ritual | custom | peach |
| dawn | dusk | basket | ritual | symbol | proton |
| farm | ranch | cushion | shield | sword | attic |
| farm | barn | bishop | shield | arrow | pepper |
| farm | fence | thumb | shield | spear | amber |
| feast | supper | bias | slave | captive | aspect |
| feast | wedding | blame | slave | abuse | quiz |
| feast | picnic | skull | slave | hostage | skirt |
| fee | ticket | beast | soap | germs | wire |
| fee | lawyer | cliff | soap | towel | lecture |
| fee | payment | shovel | soap | wash | cuff |
| foam | bubble | belt | toilet | urine | leather |
| foam | bathtub | behalf | toilet | mirror | legend |
| foam | mousse | barrier | toilet | shower | ghost |
| fog | smog | blade | torch | beam | accent |
| fog | hail | weapon | torch | candle | tissue |
| fog | cloud | trophy | torch | lamp | ache |
| grin | tooth | battery | wool | sheep | wisdom |
| grin | frown | famine | wool | cotton | axis |
| grin | joy | bell | wool | fibre | actress |
| growl | throat | chips |  |  |  |
| growl | wolf | aisle |  |  |  |
| growl | belly | fringe |  |  |  |
| hamster | mouse | bible |  |  |  |
| hamster | pet | bench |  |  |  |
| hamster | rat | poetry |  |  |  |
| heap | stack | goat |  |  |  |
| heap | mound | priest |  |  |  |
| heap | pile | destiny |  |  |  |
| hive | nest | doll |  |  |  |
| hive | honey | beer |  |  |  |
| hive | bee | bicycle |  |  |  |
| join | link | billion |  |  |  |
| join | glue | scent |  |  |  |
| join | bond | savage |  |  |  |
| path | trail | clerk |  |  |  |
| path | route | pillow |  |  |  |
| path | hike | cruelty |  |  |  |
| pearl | diamond | doom |  |  |  |
| pearl | jewel | code |  |  |  |
| pearl | ruby | dessert |  |  |  |
| pouch | purse | vinegar |  |  |  |
| pouch | sack | toad |  |  |  |
| pouch | wallet | text |  |  |  |
| rust | decay | cluster |  |  |  |
| rust | chain | uterus |  |  |  |
| rust | metal | comedy |  |  |  |
| sip | alcohol | biology |  |  |  |
| sip | gulp | collar |  |  |  |
| sip | liquid | eel |  |  |  |
| slot | coin | ego |  |  |  |
| slot | slit | mile |  |  |  |
| slot | gap | rice |  |  |  |
| snake | lizard | ashtray |  |  |  |
| snake | venom | element |  |  |  |
| snake | bite | grace |  |  |  |
| soup | dish | socket |  |  |  |
| soup | spoon | fist |  |  |  |
| soup | spice | title |  |  |  |
| spy | agent | fossil |  |  |  |
| spy | agency | width |  |  |  |
| spy | mission | fungus |  |  |  |
| stain | mud | embassy |  |  |  |
| stain | sauce | trout |  |  |  |
| stain | dirt | fox |  |  |  |
| widow | spouse | drums |  |  |  |
| widow | grief | gipsy |  |  |  |
| widow | funeral | talent |  |  |  |

**Appendix 3**

Target-probe word pairs used in Experiment 2.

| Trained word pairs | | | Untrained word pairs | | |
| --- | --- | --- | --- | --- | --- |
| Target | Related probe | Unrelated probe | Target | Related probe | Unrelated probe |
| ant | insect | cruise | abuse | alcohol | layer |
| bandage | gauze | coffee | actor | cinema | buffalo |
| bone | muscle | flask | beak | eagle | prison |
| bruise | injury | pork | boat | canoe | kiss |
| cage | zoo | jacket | butter | bun | blouse |
| cake | icing | gorilla | cliff | coast | desk |
| carpet | rug | monster | cod | eel | toy |
| carton | package | heaven | creek | stream | skull |
| crew | pilot | falcon | demon | angel | ankle |
| dawn | horizon | ship | elbow | knee | priest |
| farm | ranch | throat | fin | dolphin | sand |
| feast | wedding | leaf | flower | lily | arrow |
| fee | wage | beef | fur | fox | basil |
| foam | bubble | axe | goose | pigeon | fist |
| fog | sky | boxer | hat | hood | skeleton |
| grin | frown | fruit | hay | barn | beast |
| growl | wolf | cork | herd | crowd | monitor |
| mouse | cheese | coal | moon | galaxy | puppy |
| heap | mound | swan | ocean | lake | victory |
| hive | honey | copper | puddle | pond | thigh |
| join | glue | apple | reward | medal | wasp |
| path | forest | bird | rod | fish | lunch |
| pearl | gem | pony | shield | weapon | thumb |
| pouch | purse | vision | silk | satin | dog |
| rust | metal | cave | sword | knife | moth |
| sip | juice | golf | toe | leg | liquid |
| slot | coin | banana | torch | lamp | noise |
| snake | venom | calcium | turkey | chicken | lens |
| soup | dish | prize | vein | wrist | cloak |
| spy | agent | flu | vote | ballot | lion |
| stain | mud | tiger | wig | scalp | flute |
| widow | funeral | guard | wool | sweater | baker |
